# Supplementary material for: Testing a school-based program to promote digital health literacy and healthy lifestyle behaviours in intermediate elementary students: The Learning for Life program
Source: PubMed Central journal article supplement — Prev Med Rep. 2020 Jun 18;19:101149. doi: 10.1016/j.pmedr.2020.101149 (PMC7347644; doi:10.1016/j.pmedr.2020.101149), 2020-06-18
Supplement: mmc2.pdf [file mmc2.pdf]

# LEARNING FOR LIFE MDAWN KIDS EHEALS SURVEY

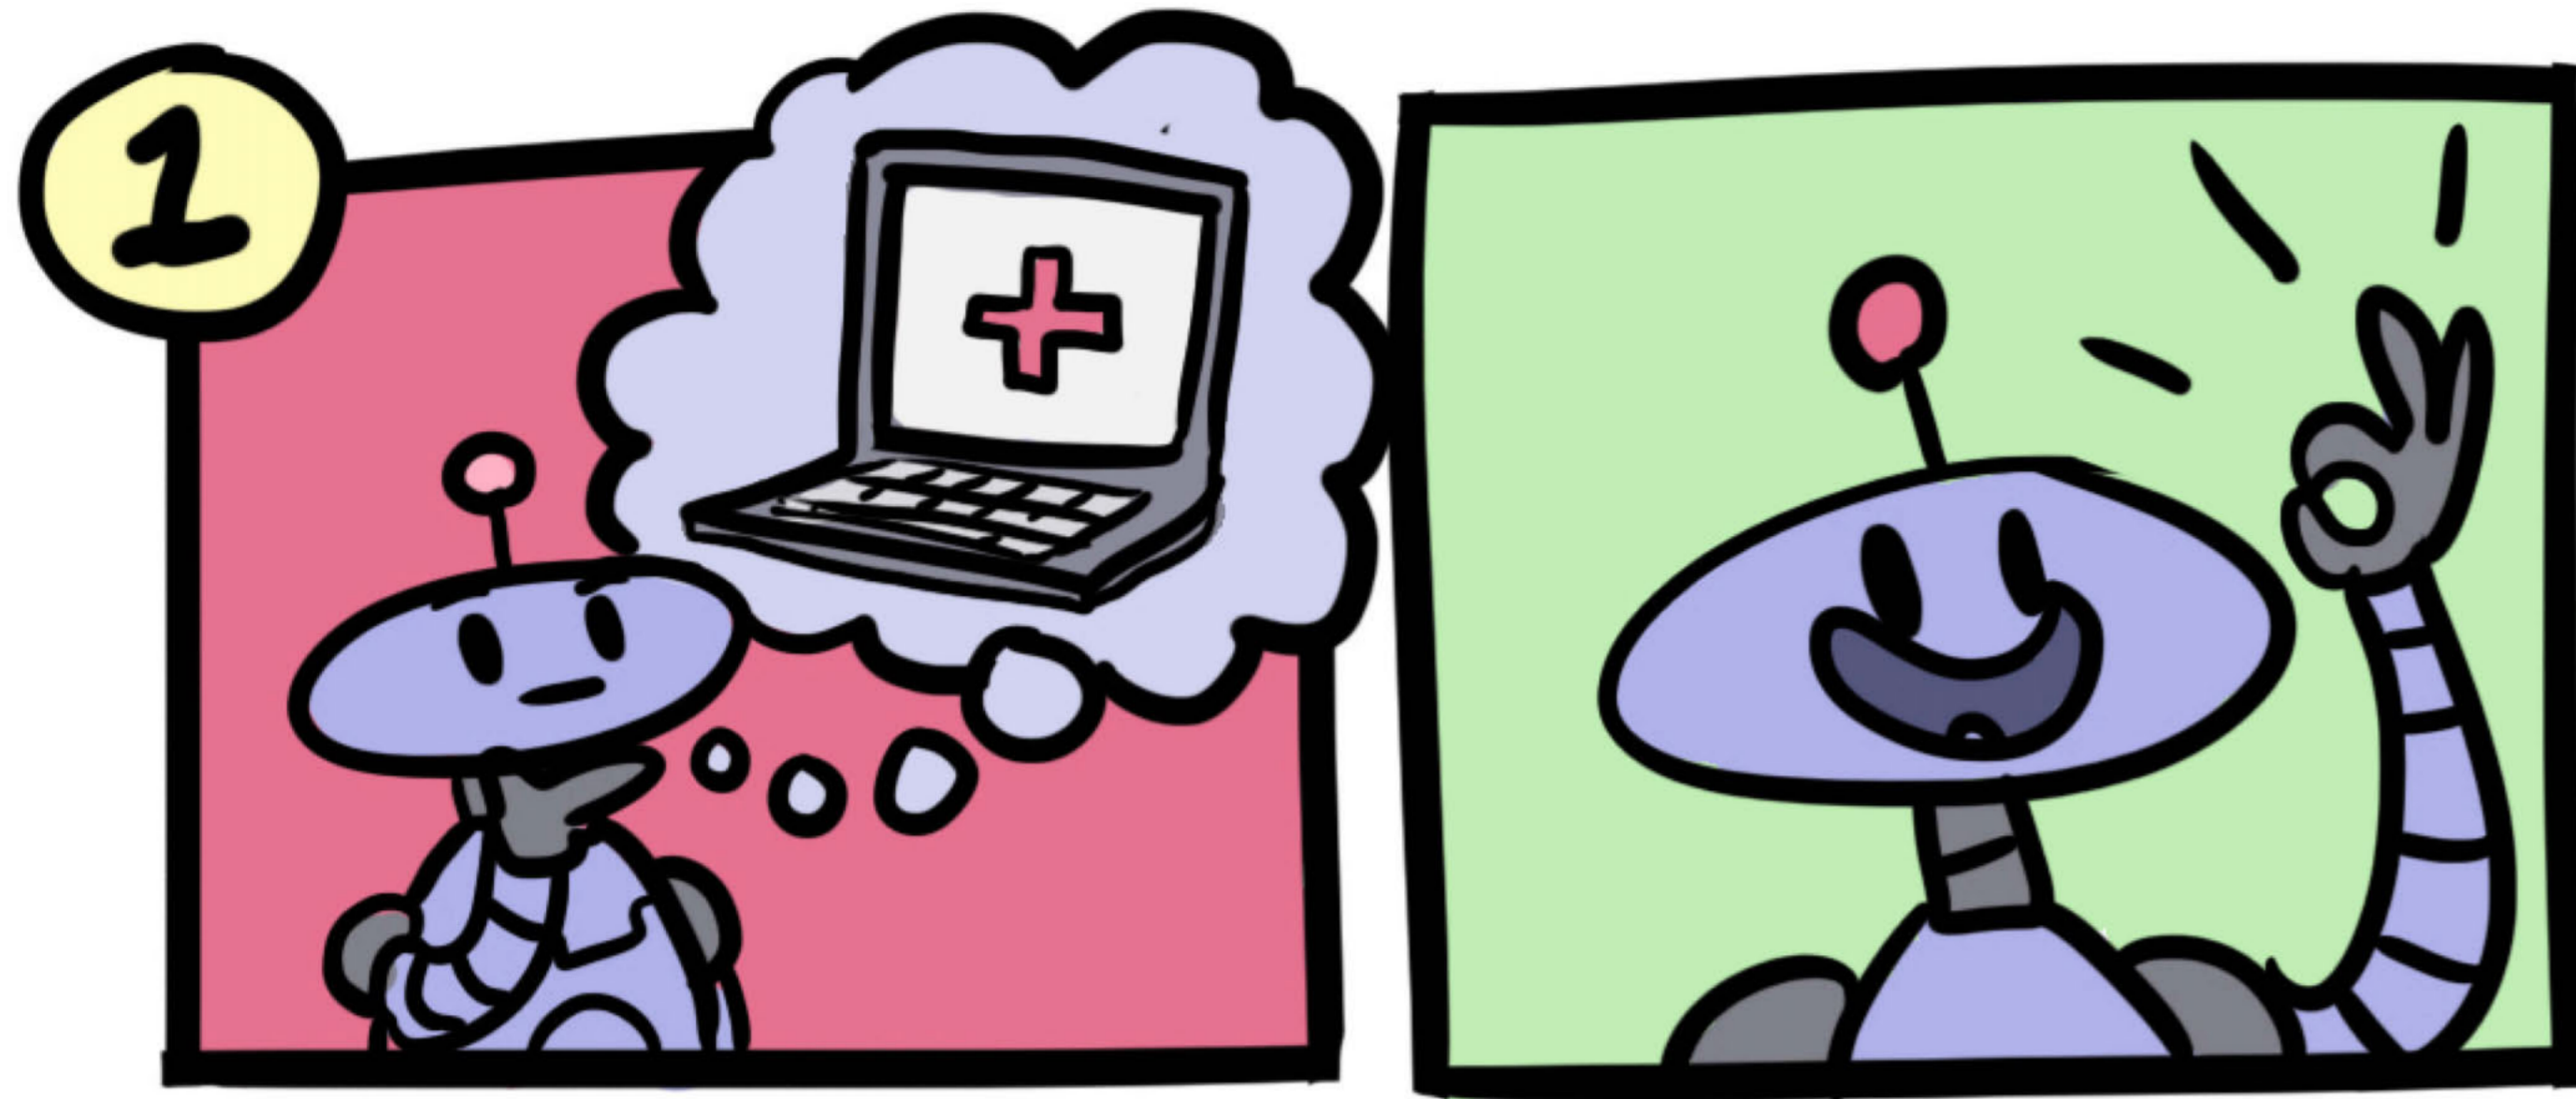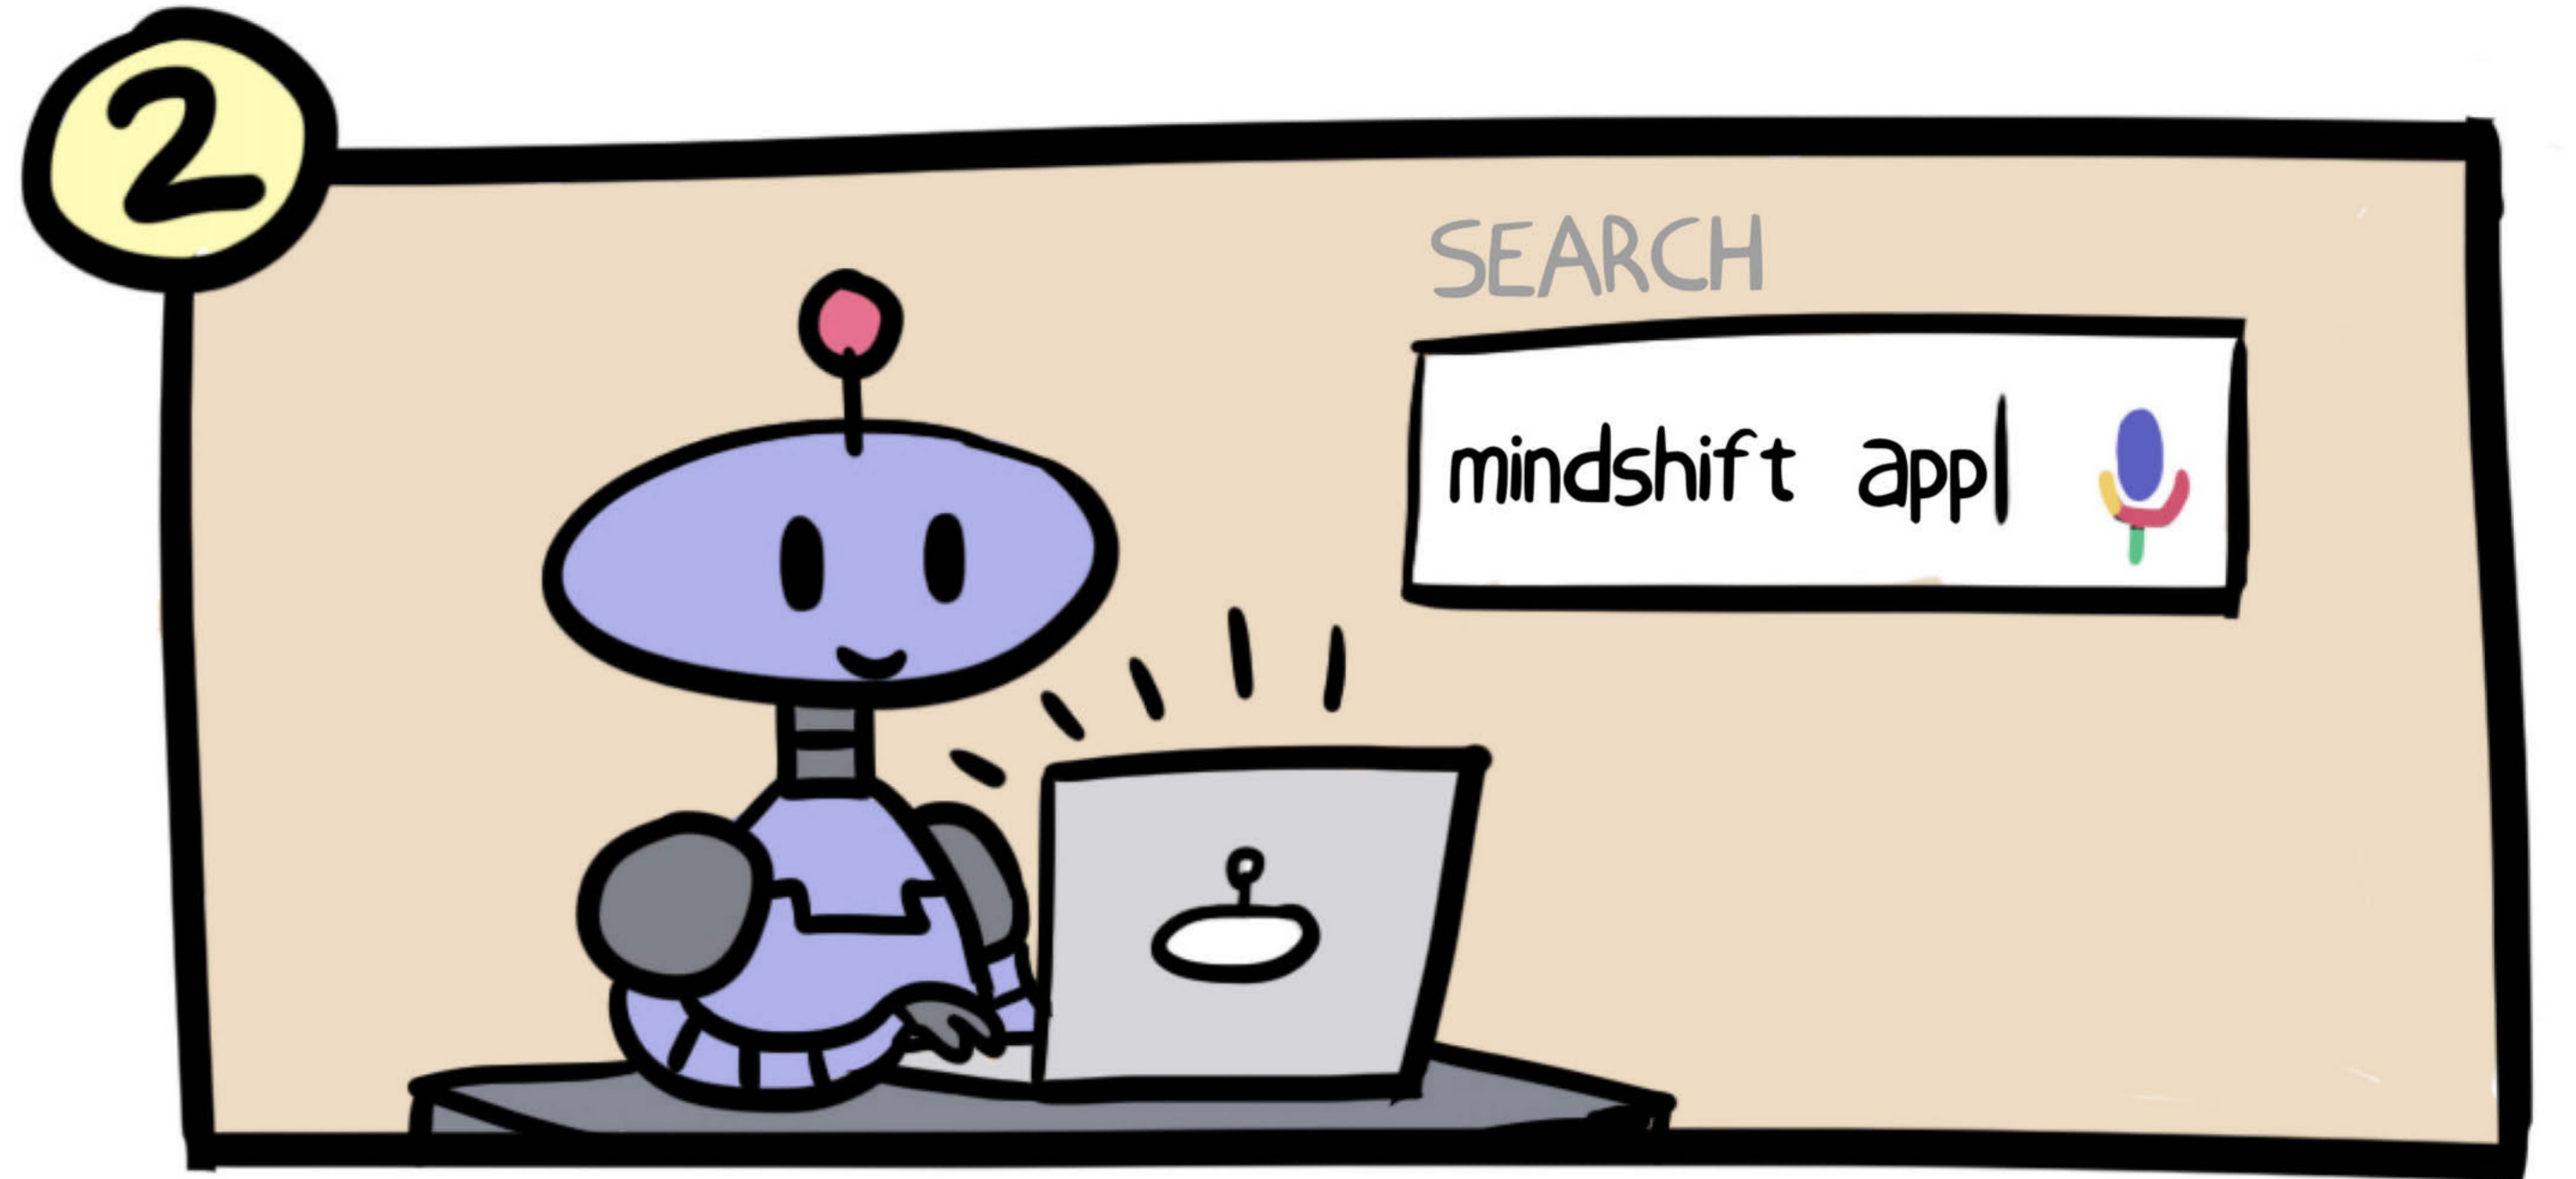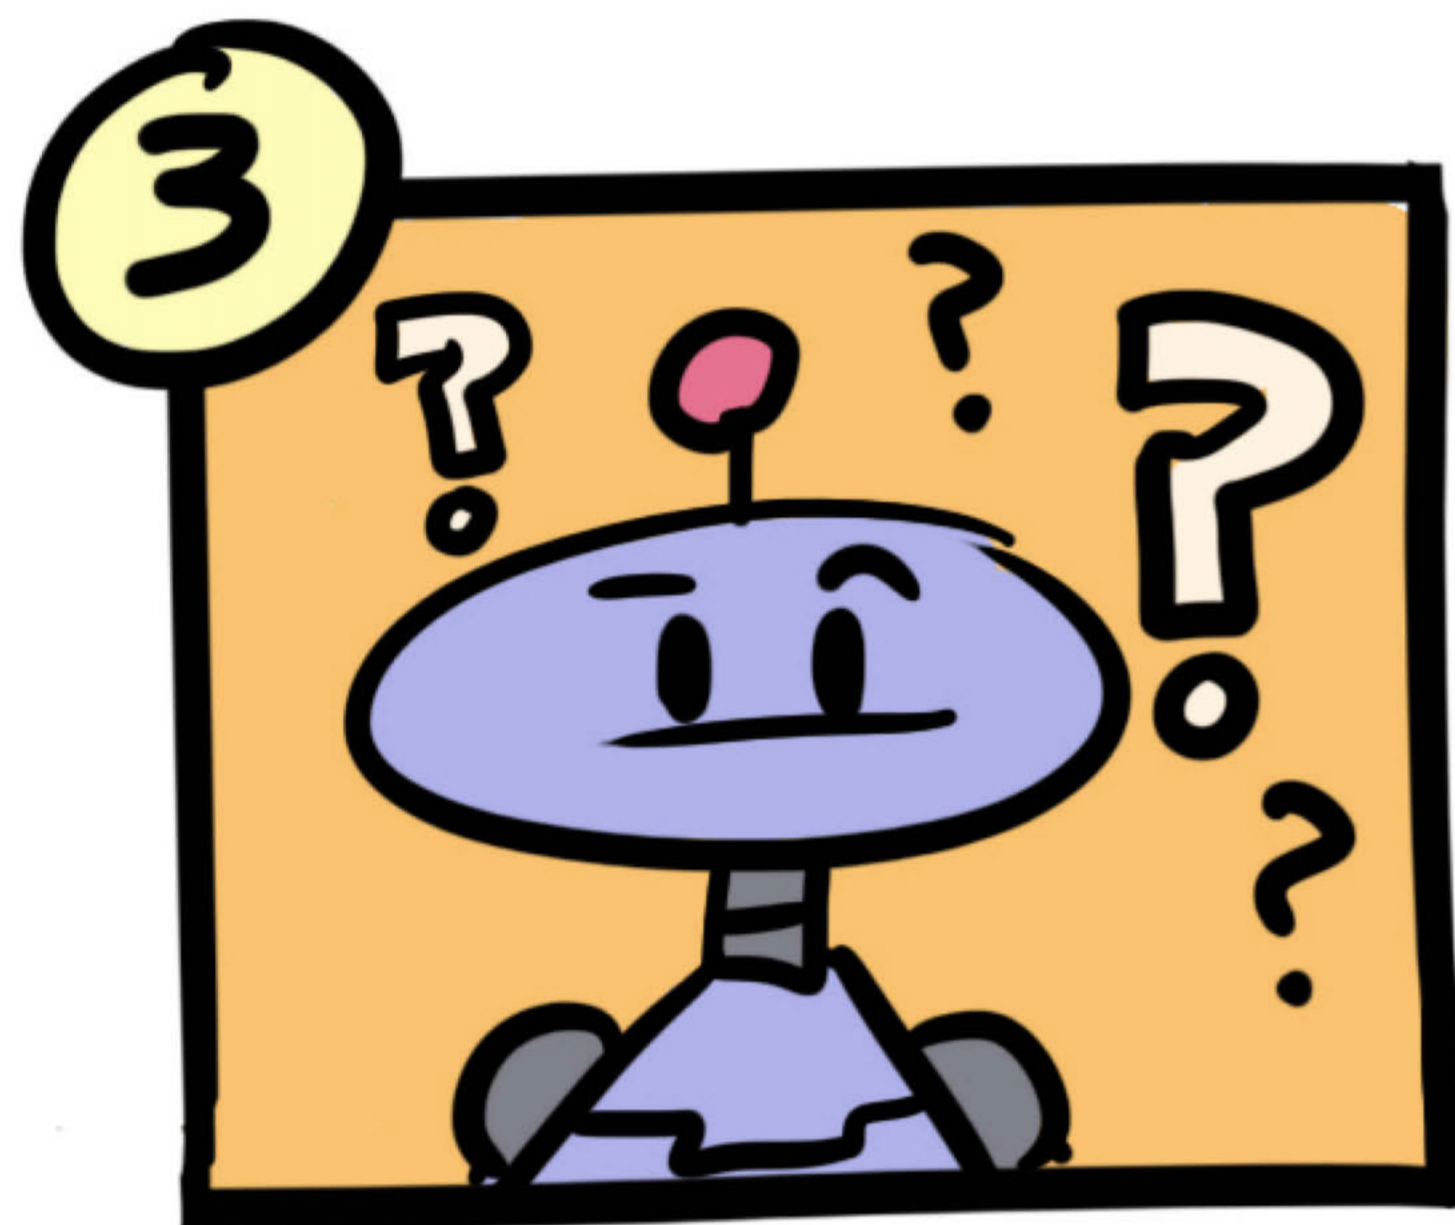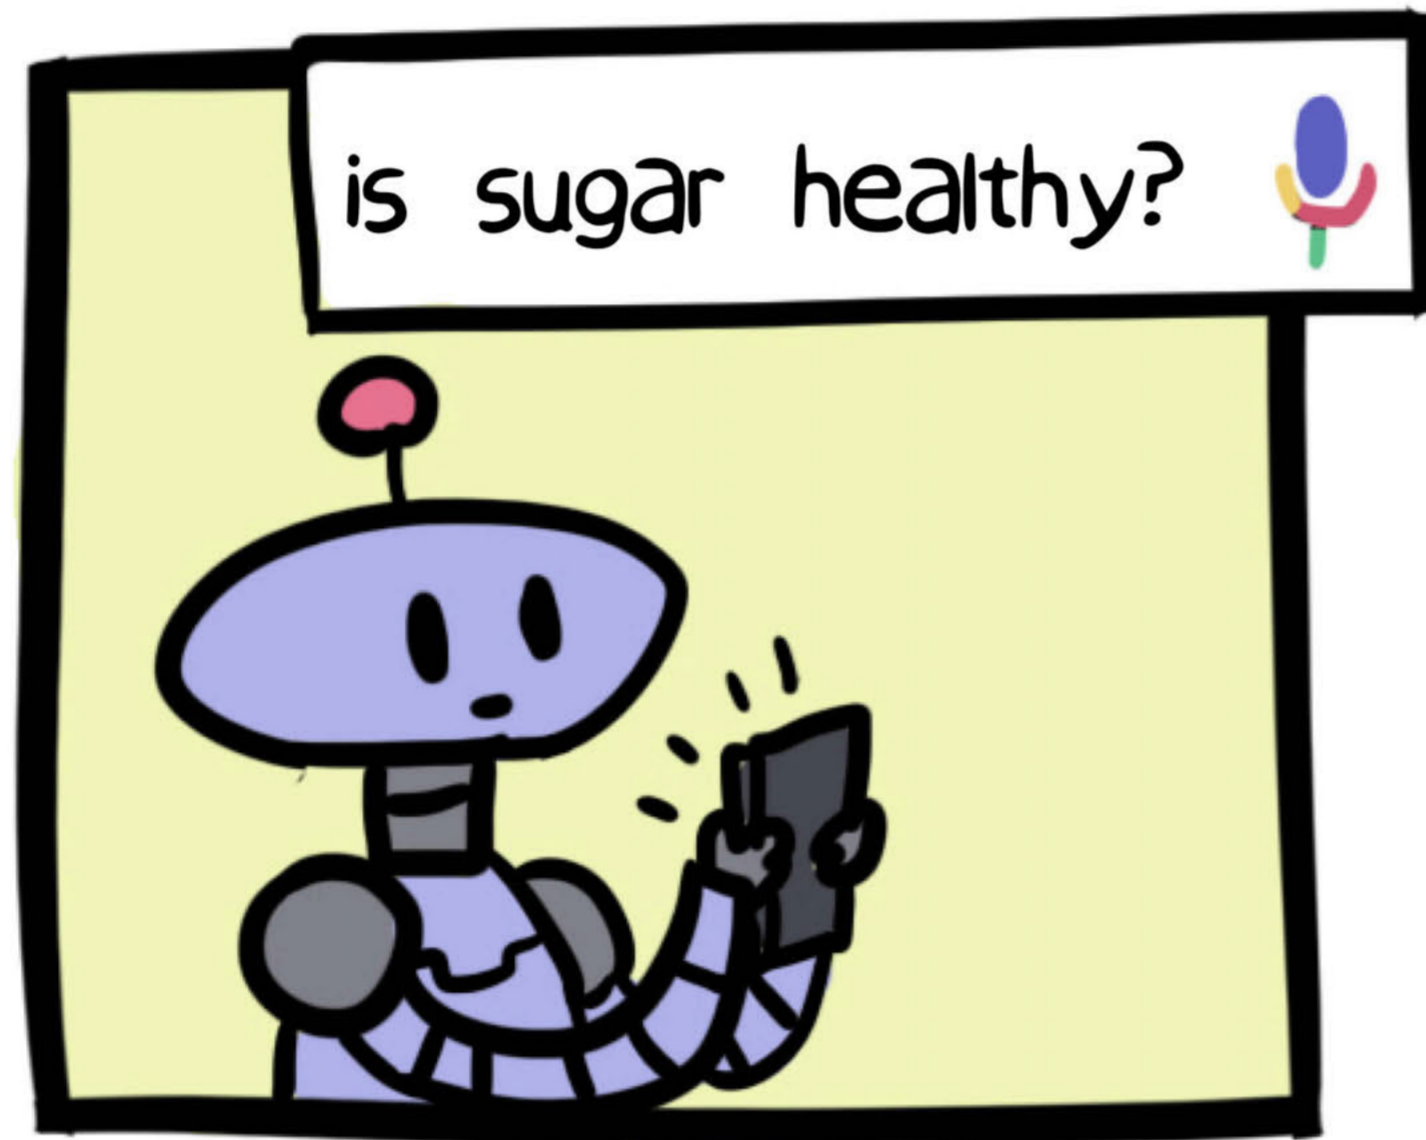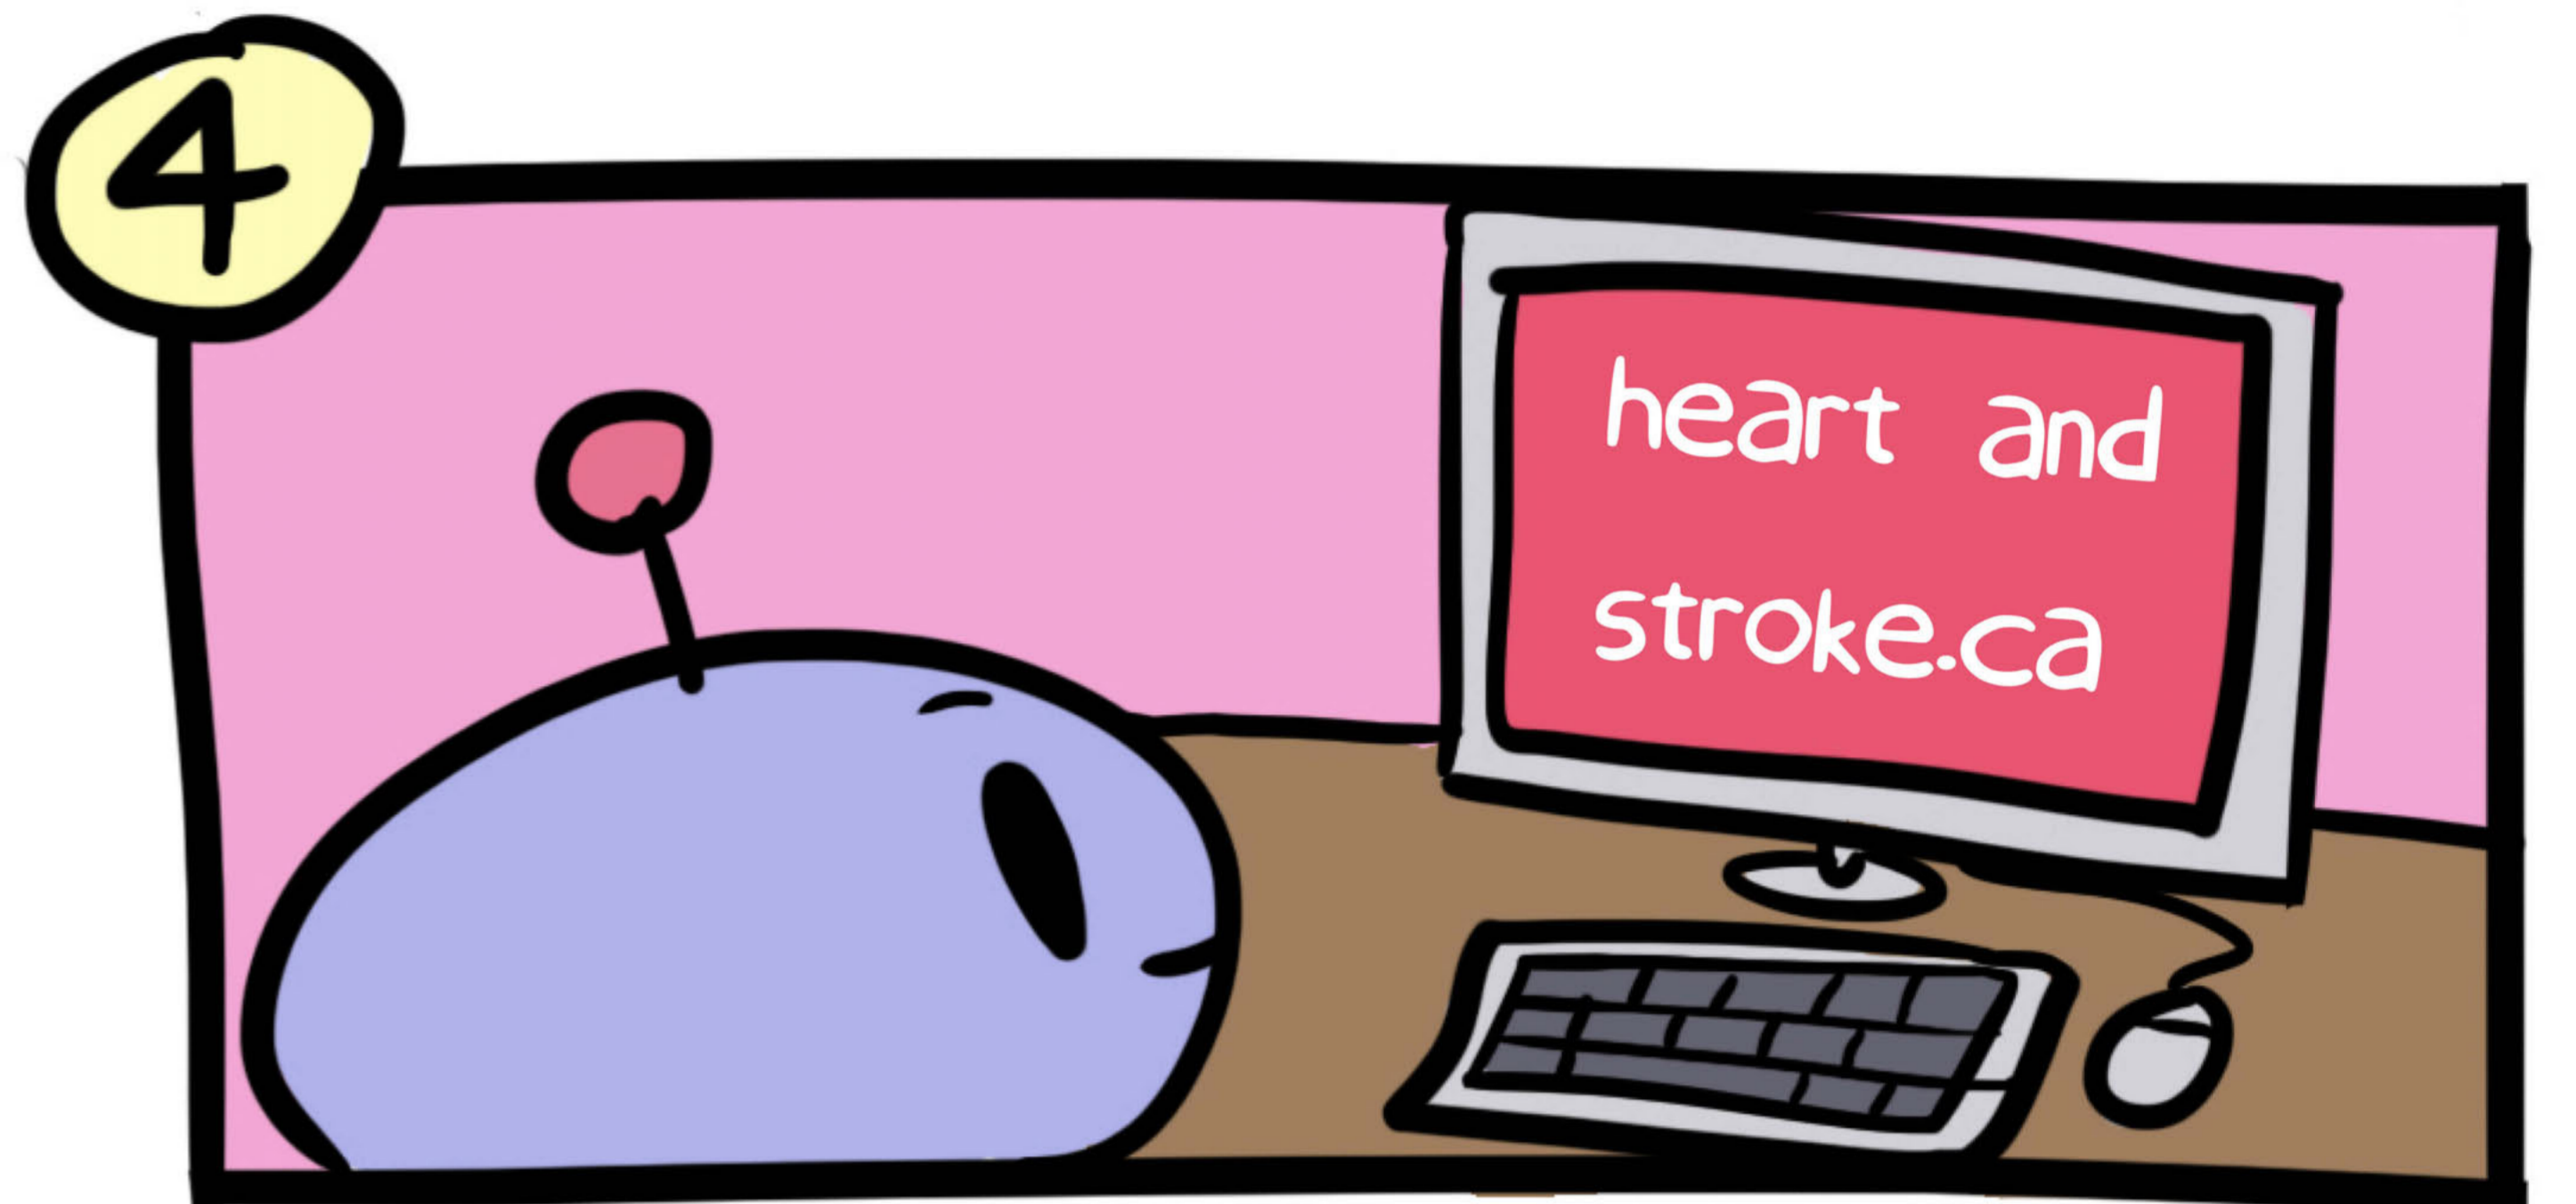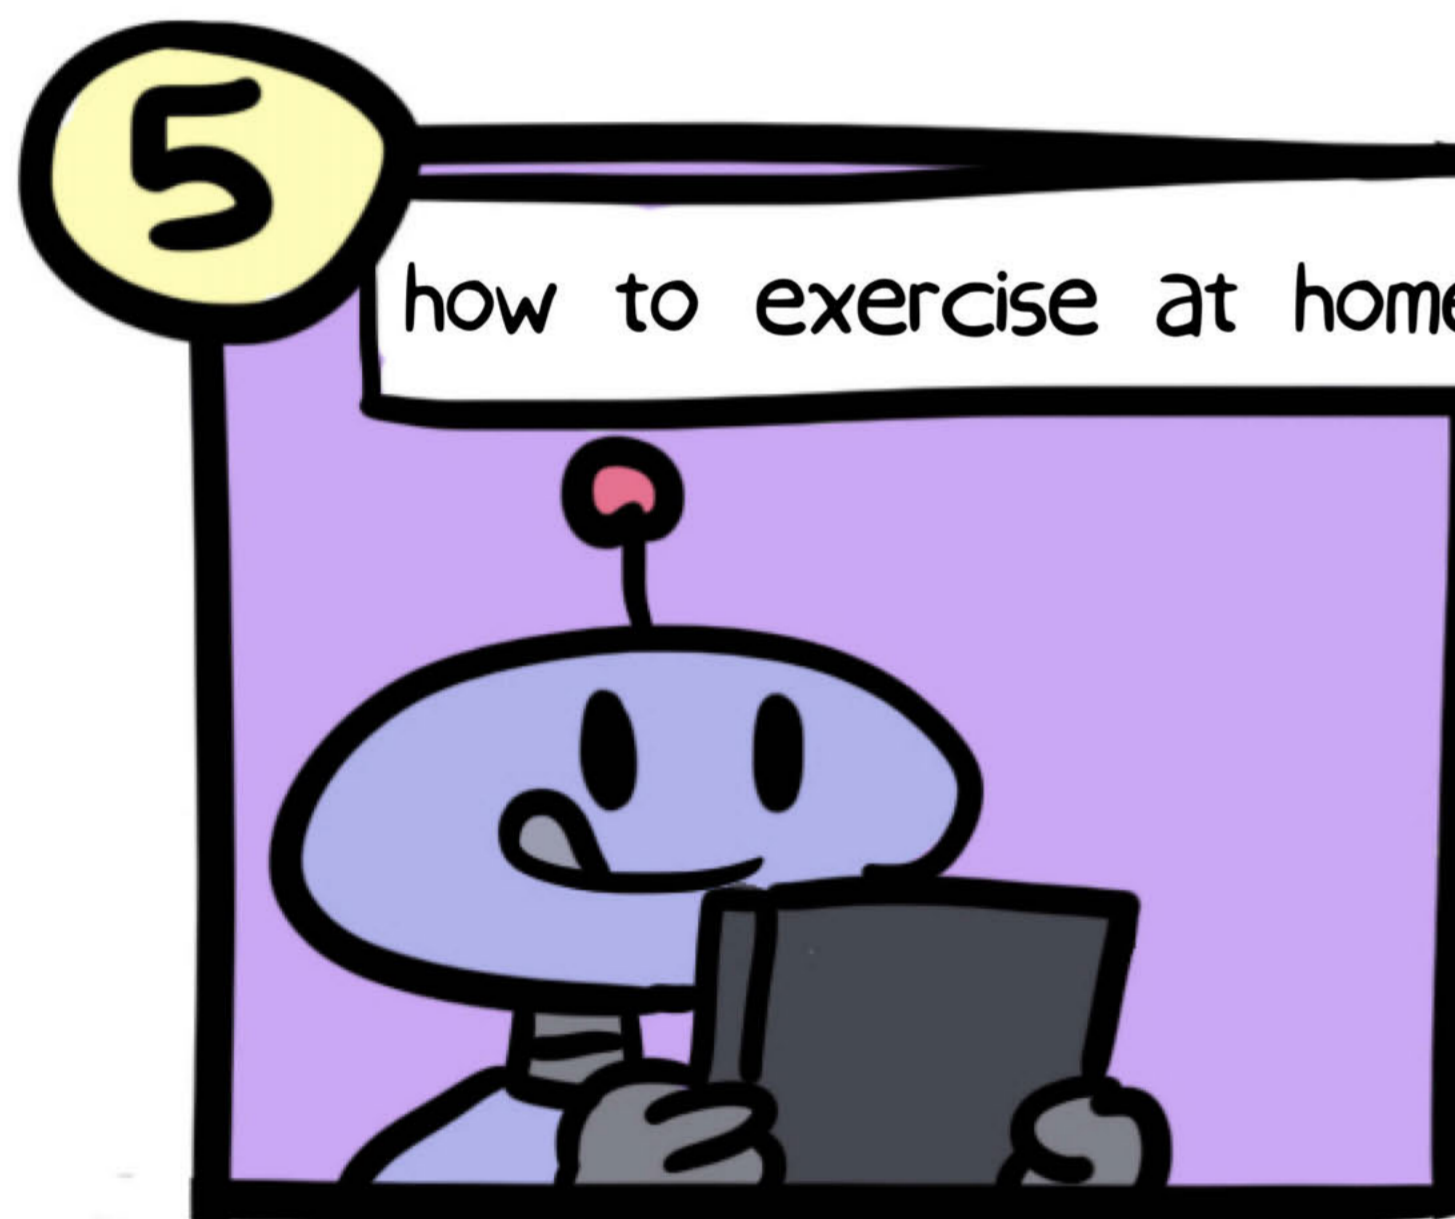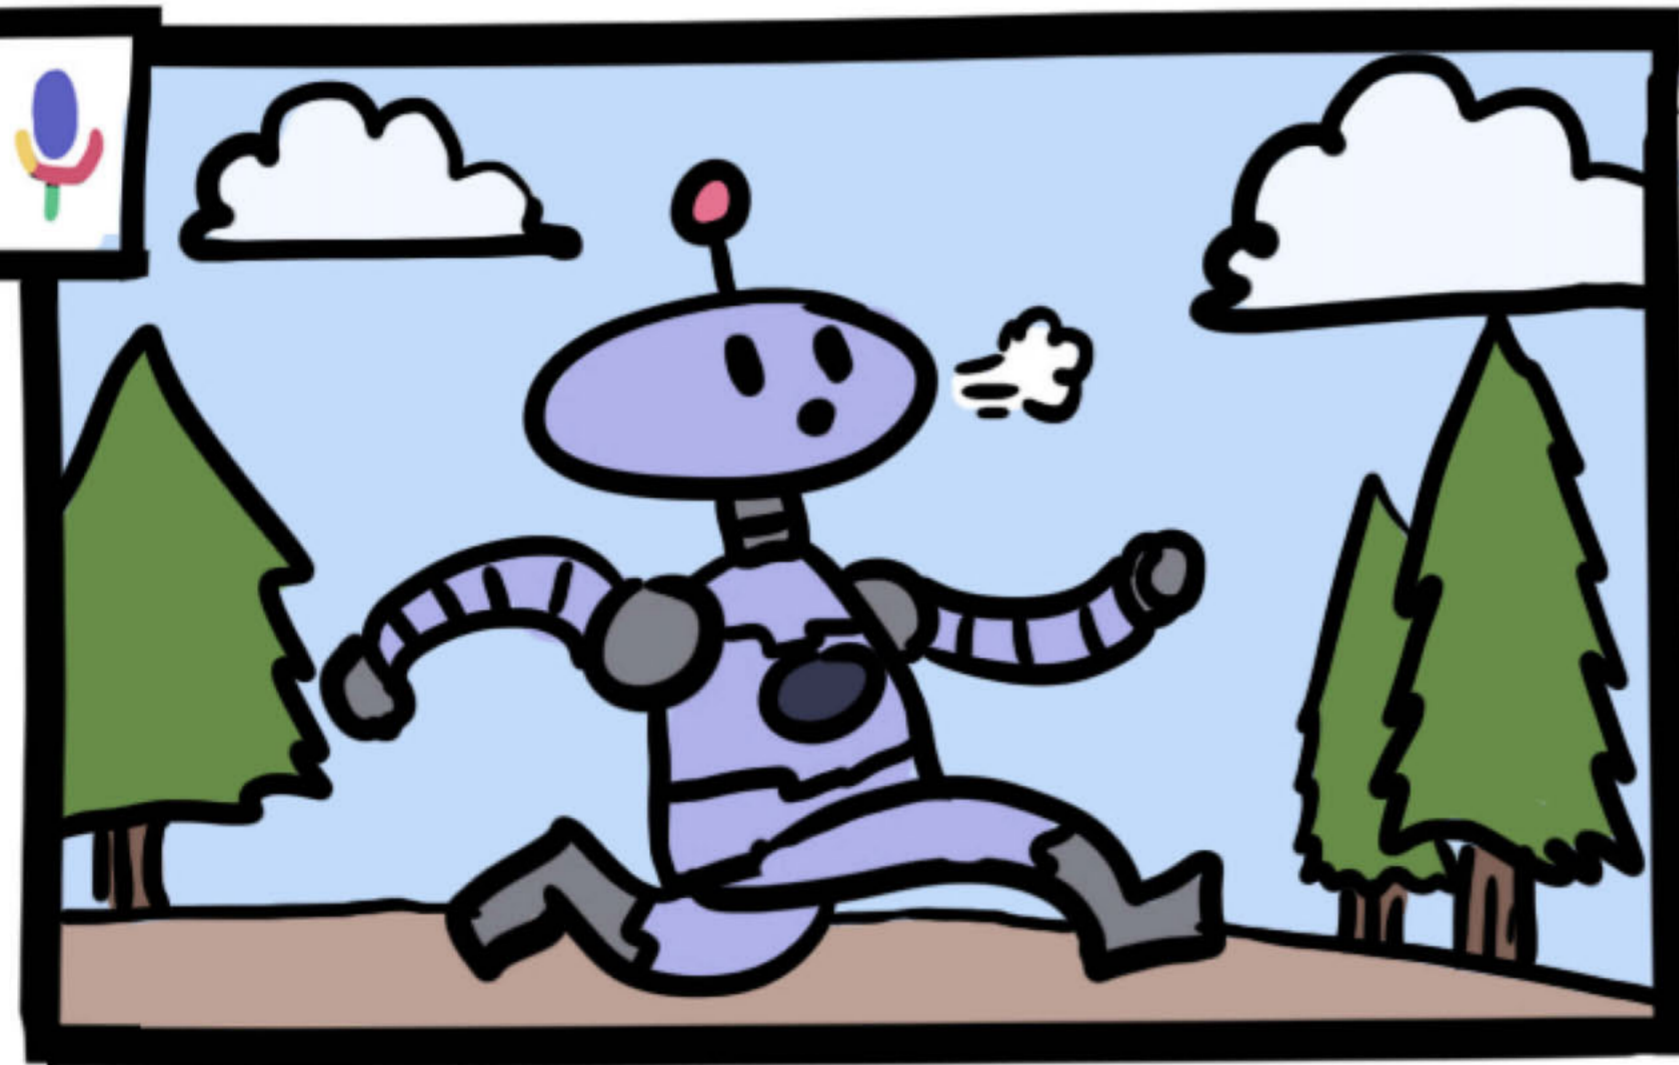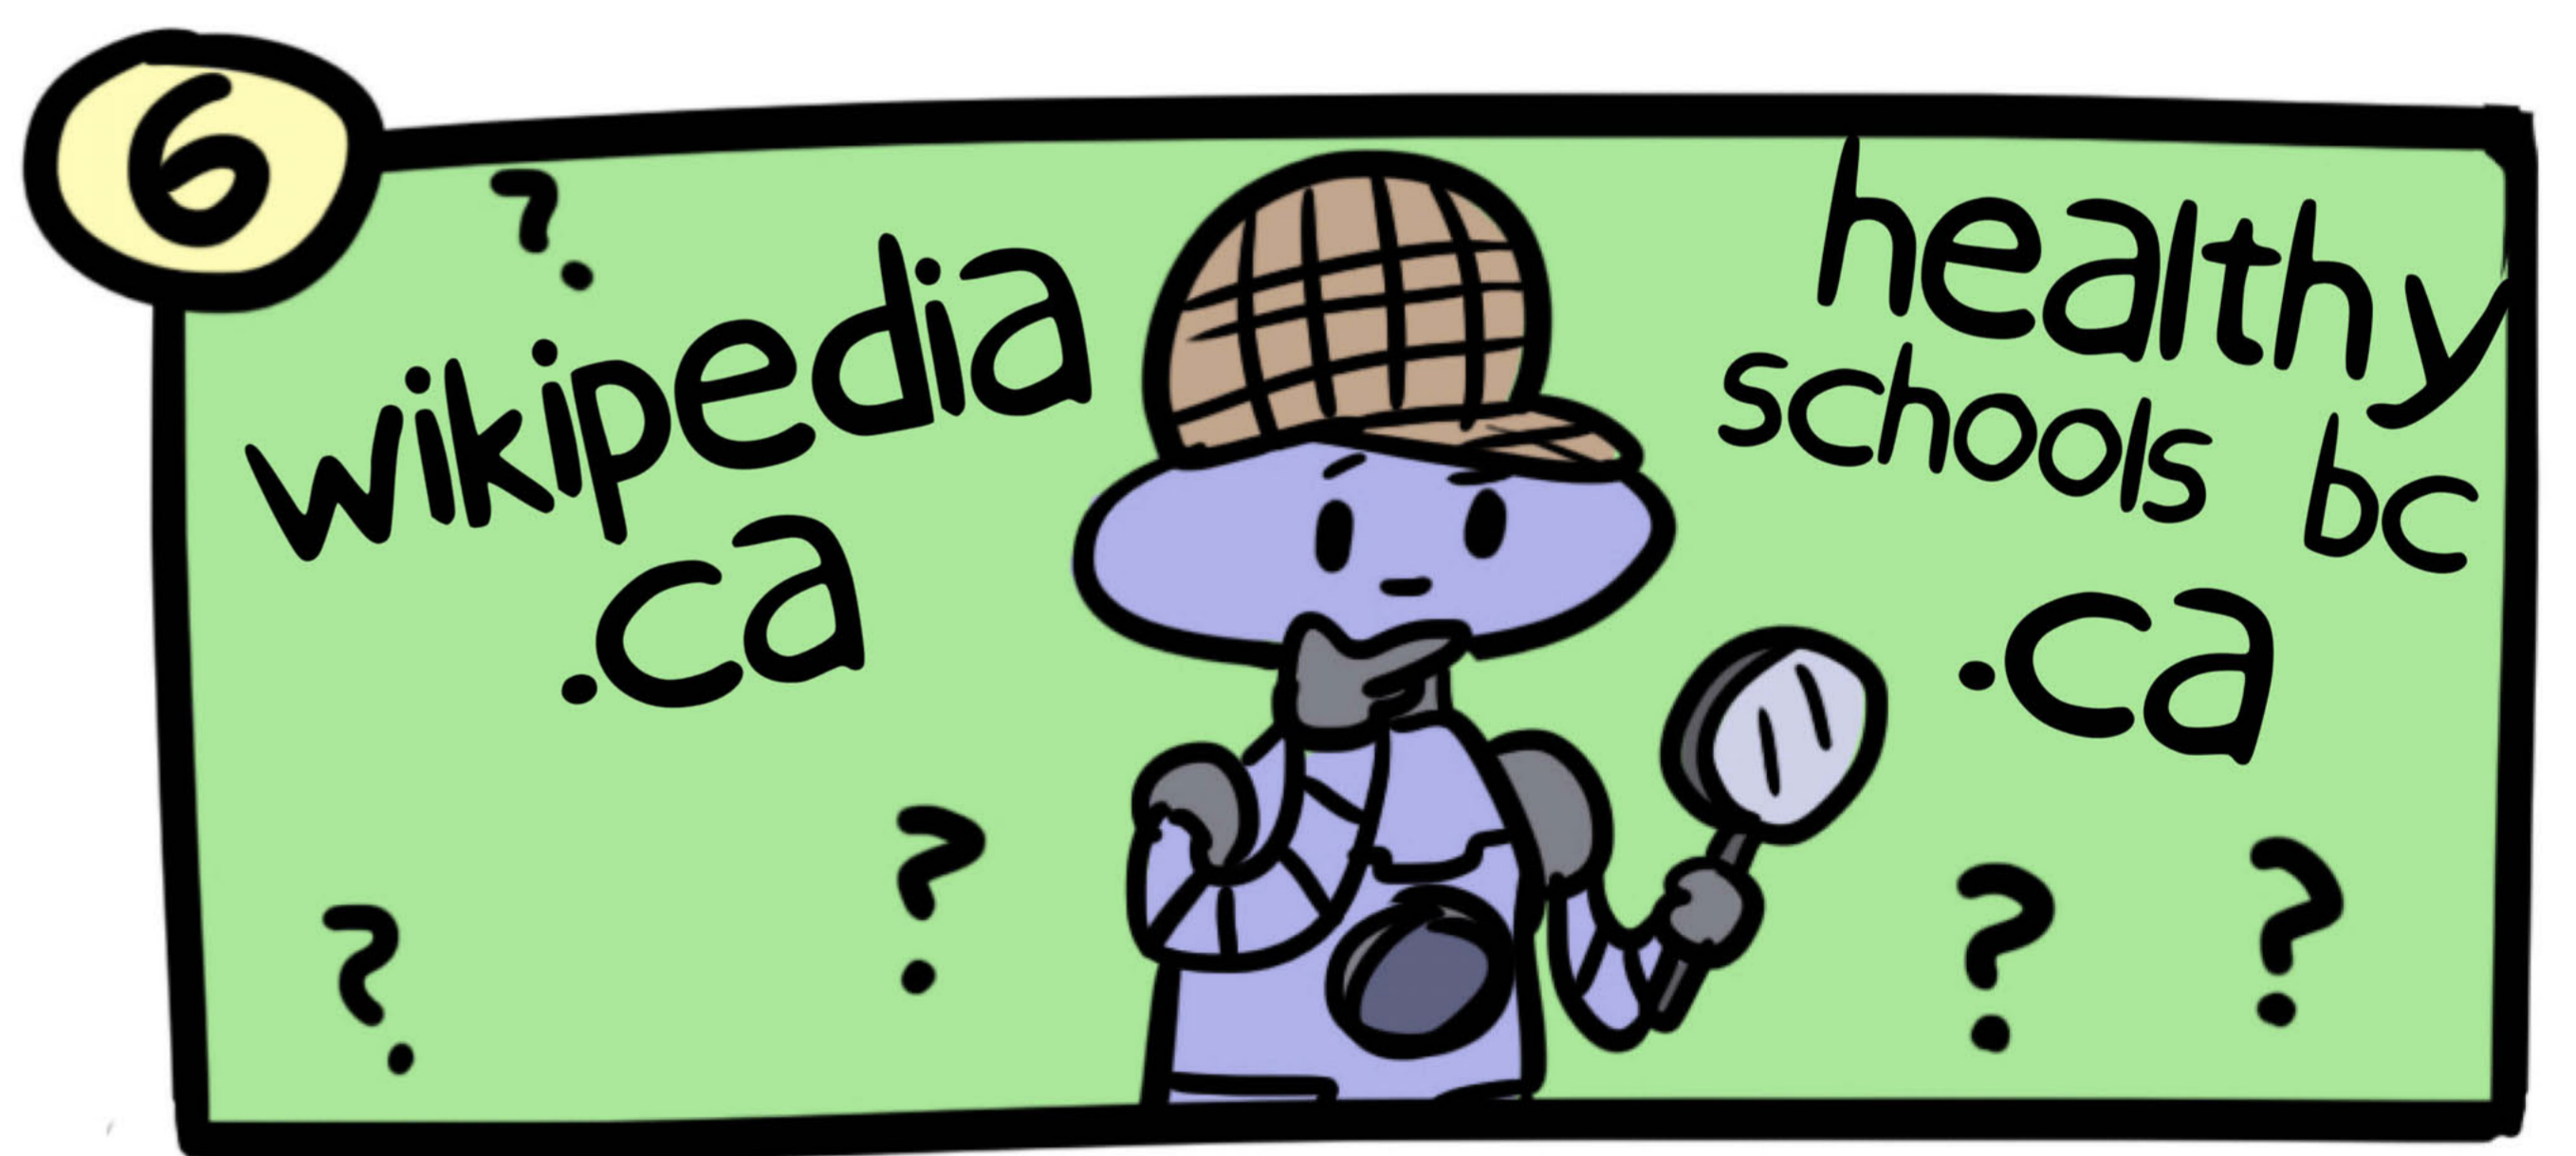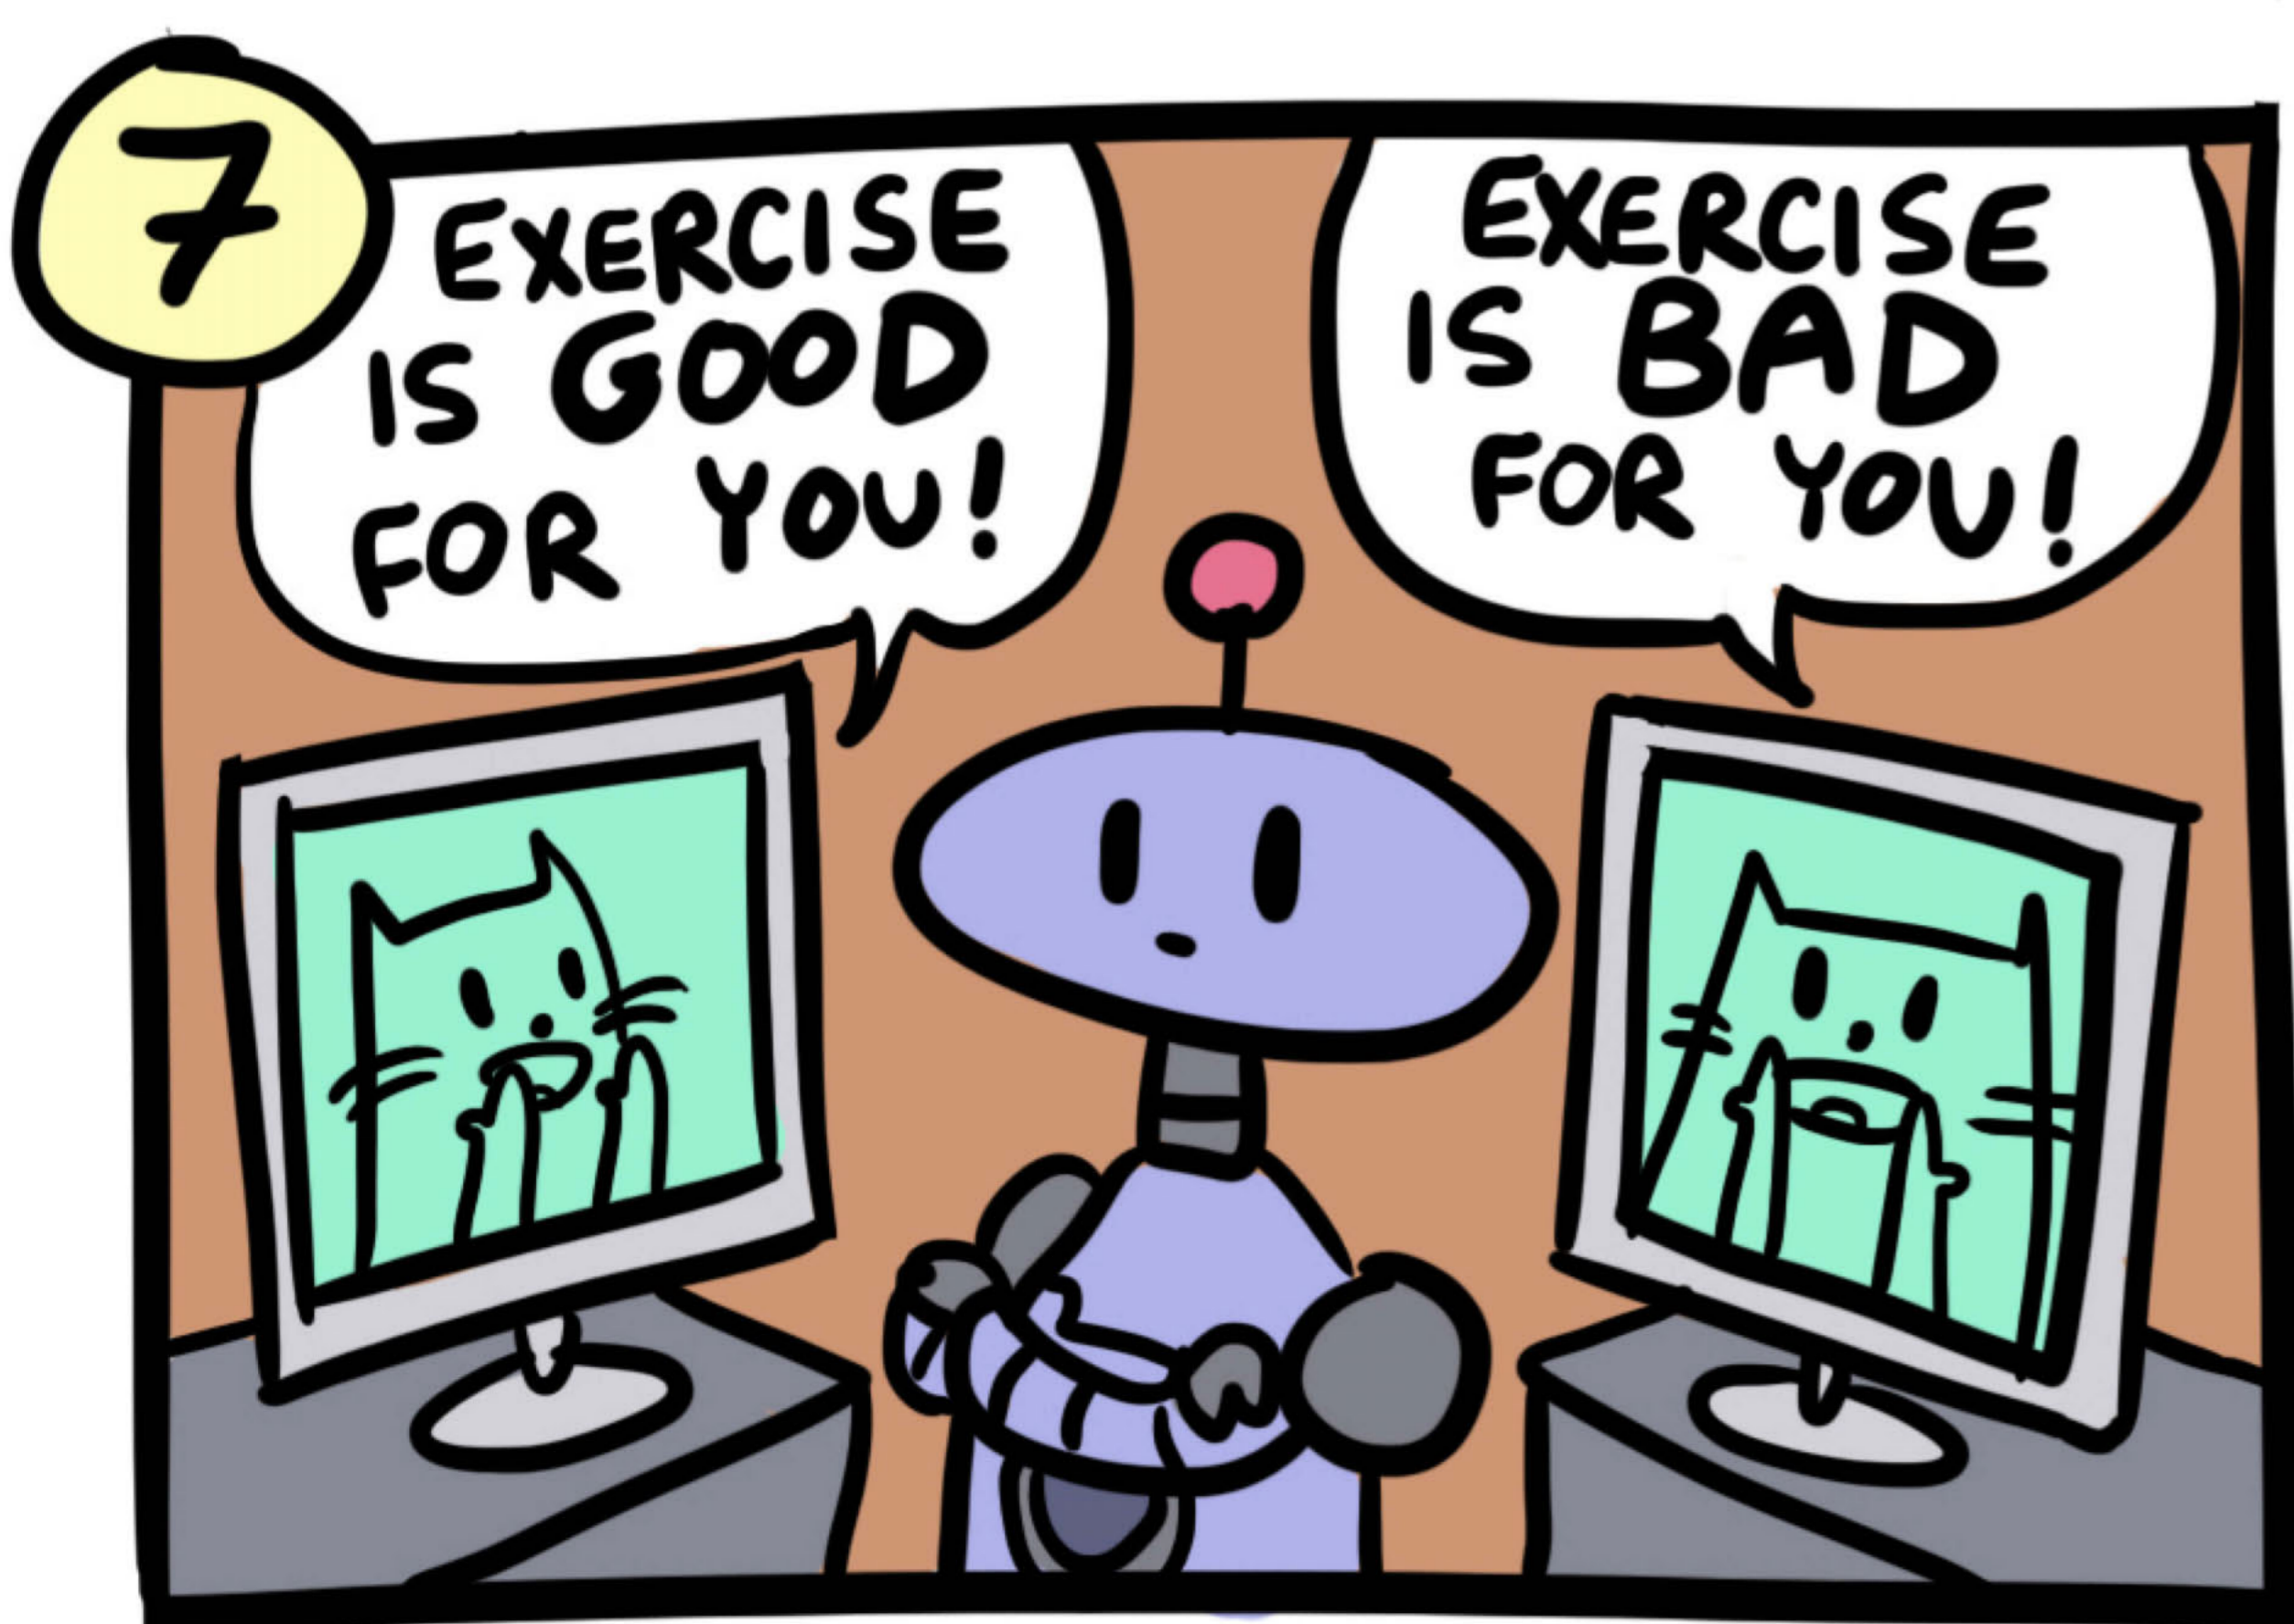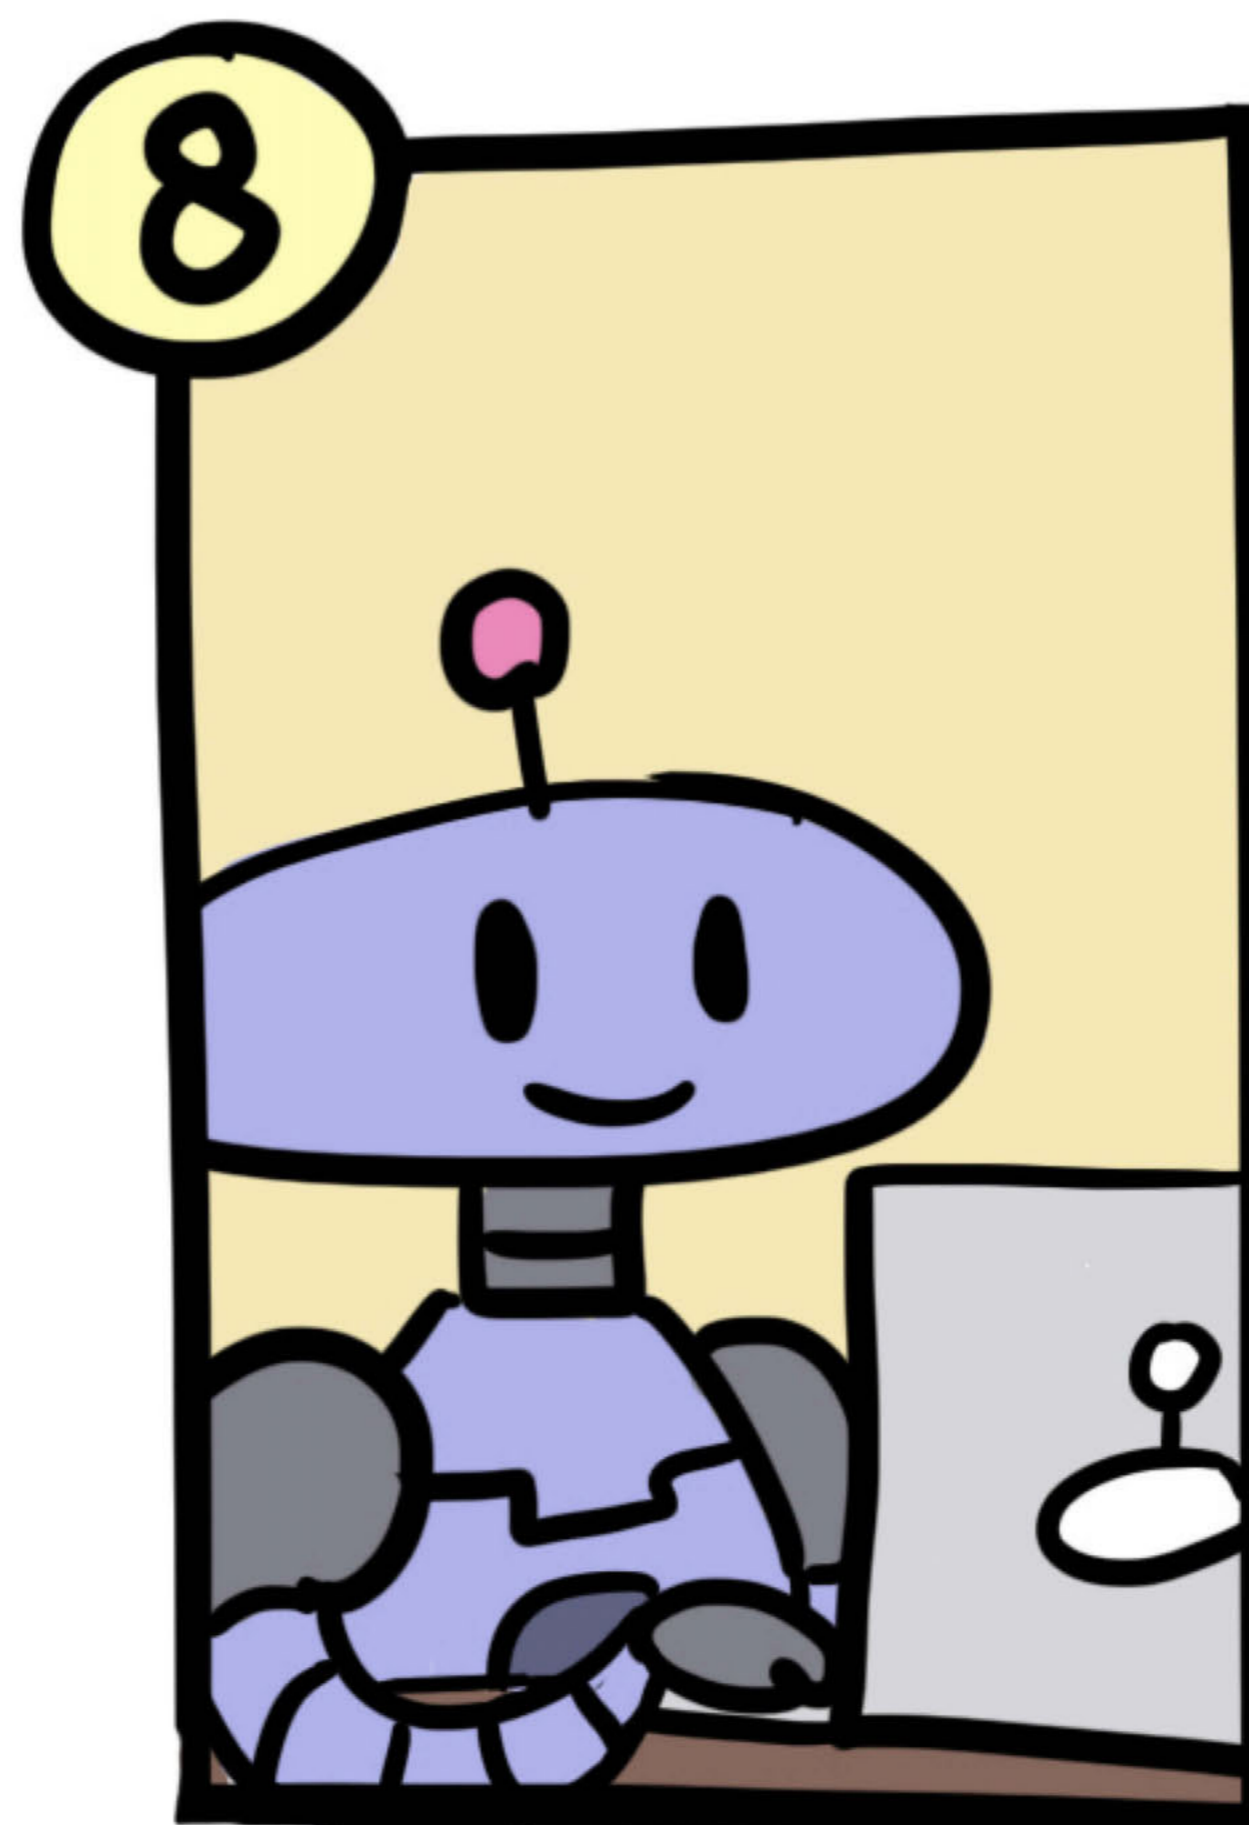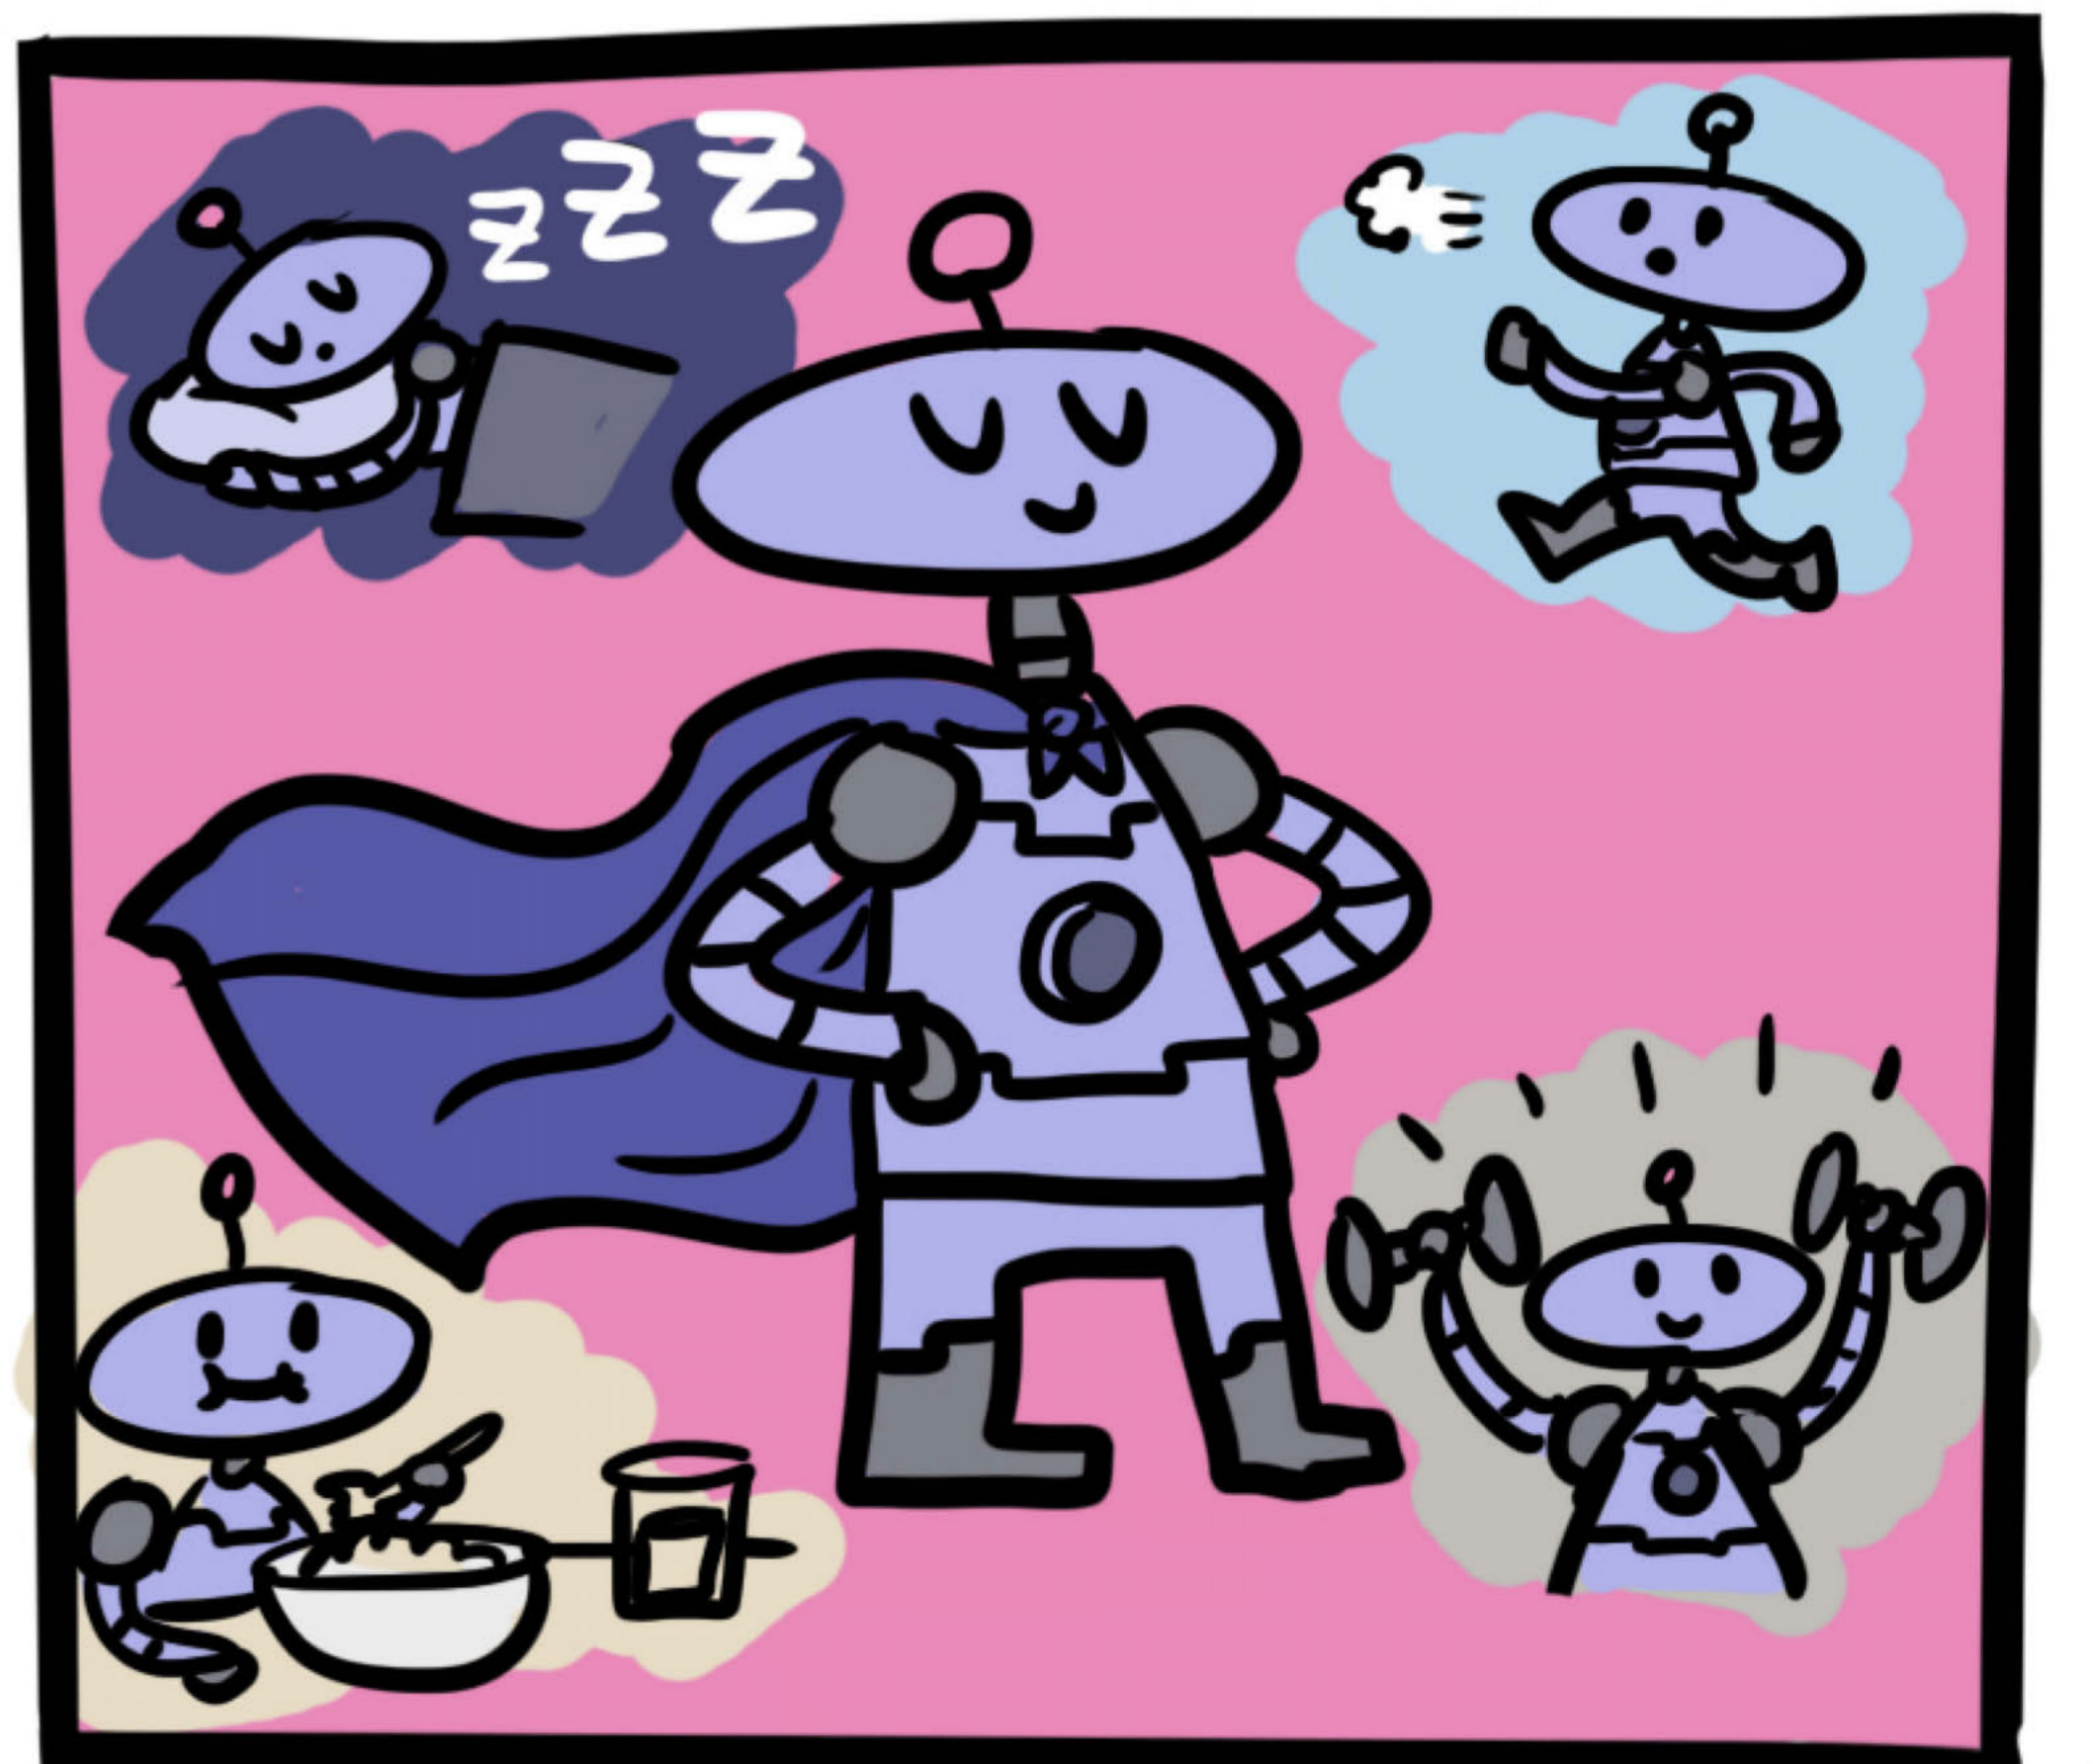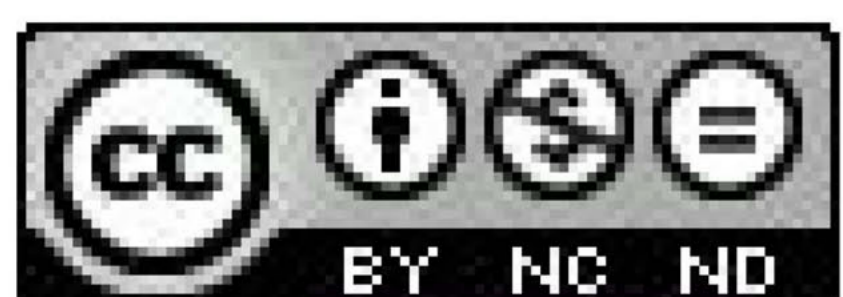

University of British Columbia 2017

© 2017 by the University of British Columbia (UBC). Student Assent Graphics. This work is licensed under the Creative Commons Attribution-NonCommercial-NoDerivatives 4.0 International License. To view a copy of this license, visit <http://creativecommons.org/licenses/by-nc-nd/4.0/>. Created by UBC Digital Emergency Medicine. For more information please contact [digem.assistant@ubc.ca](mailto:digem.assistant@ubc.ca).

Armin MORTAZAVI
